# Supplementary material for: Parents’ experiences of being involved in medical decision-making for their child with a life-limiting condition: A systematic review with narrative synthesis
Source: PubMed Central journal article supplement (PMC10798032; doi:10.1177/02692163231214414), 2023-12-06
Supplement: sj-pdf-2-pmj-10.1177_02692163231214414.pdf [file sj-pdf-2-pmj-10.1177_02692163231214414.pdf]

## Appendix 2

### Codes

| <b>Theme</b>                                                   | <b>Subthemes</b>                                                                                                                                           | <b>Codes</b>                                                                                                                                                                                                                    |
|----------------------------------------------------------------|------------------------------------------------------------------------------------------------------------------------------------------------------------|---------------------------------------------------------------------------------------------------------------------------------------------------------------------------------------------------------------------------------|
| Temporal aspects affecting the experience with decision-making | Lack of time while making the decision<br>Difficulty to foresee the future                                                                                 | Lack of time<br>Difficult to plan for the future                                                                                                                                                                                |
| Losing control of the situation                                | Not having real choice<br>Being forced into the decision<br>Difficulty grasping the reality                                                                | Being forced into decision<br>Difficulty to grasp reality<br>Feeling not making the decision by themselves<br>Being judged<br>Conflict with doctors<br>Information overload<br>Not respecting parents<br>Not having real choice |
| Transferring the power to decide to the doctors                | Reluctance to make decision<br>Transferring the responsibility to doctors<br>Relying on the doctor's expertise<br>Lack of confidence and medical expertise | Don't want to make the decision<br>Lack of confidence<br>No medical expertise<br>Previous experience<br>Transferring the responsibility to HCP<br>Doctor's expertise                                                            |

|                                                    |                                                                                                                   |                                                                                                                                                                                                                                                                                                                                                                                                                                                                            |
|----------------------------------------------------|-------------------------------------------------------------------------------------------------------------------|----------------------------------------------------------------------------------------------------------------------------------------------------------------------------------------------------------------------------------------------------------------------------------------------------------------------------------------------------------------------------------------------------------------------------------------------------------------------------|
| <p>To be a “good” parent and protect the child</p> | <p>Child in the centre-what is best for the child<br/> Advocacy for the child<br/> Trying everything possible</p> | <p>Taking responsibility for the decision<br/> Advocacy<br/> Including the child<br/> Keeping hope<br/> Keeping all options open<br/> What is best for the child<br/> Making the right decision<br/> Trying all options of treatment<br/> Outcome of the child<br/> Quality of life<br/> Keeping role of a parents<br/> Abandoning the child<br/> Protecting the child<br/> Asking second opinion<br/> Trying all options of treatment<br/> Making difficult decisions</p> |
| <p>The emotional state of parents</p>              | <p>Overall experience<br/> Range of emotions<br/> Guilt<br/> Feelings after</p>                                   | <p>Being exhausted<br/> Difficult decision<br/> Frustration<br/> Guilt feeling<br/> Regret about the decision<br/> Emotions after<br/> Having doubts<br/> Overwhelming<br/> Conflicts<br/> Anger<br/> Information overload</p>                                                                                                                                                                                                                                             |

|                                                                |                                                                                                                                                |                                                                                                                                                                                                                                                                                                                                                   |
|----------------------------------------------------------------|------------------------------------------------------------------------------------------------------------------------------------------------|---------------------------------------------------------------------------------------------------------------------------------------------------------------------------------------------------------------------------------------------------------------------------------------------------------------------------------------------------|
| <p>Sources of support to alleviate the parental experience</p> | <p>Behaviour of doctors<br/>Including parents in decision-making<br/>Having enough information<br/>Being supported by loved ones<br/>Faith</p> | <p>Faith and praying<br/>Having enough information<br/>Cooperation with parents<br/>Lack of support<br/>Respecting/not respecting parents<br/>Support from doctors<br/>Trust<br/>Specialist work as team<br/>Support from family<br/>Enough information<br/>Respecting parents' choices even if different<br/>Communication<br/>Telling truth</p> |
|----------------------------------------------------------------|------------------------------------------------------------------------------------------------------------------------------------------------|---------------------------------------------------------------------------------------------------------------------------------------------------------------------------------------------------------------------------------------------------------------------------------------------------------------------------------------------------|
